# Supplementary material for: O-Nitrobenzyl-alt-(phenylethynyl)benzene copolymer-based nanoaggregates with highly efficient two-photon-triggered degradable properties via a FRET process
Source: Royal Society of Chemistry journal article supplement (doi:10.1039/c6py00420b), 2016-01-01
Supplement: c6py00420b1.pdf [file c6py00420b1.pdf]

## SUPPORTING INFORMATION

### **O-nitrobenzyl-*alt*-(phenylethynyl)benzene copolymer-based nanoaggregates with highly efficient two-photon-triggered degradable property via a FRET process**

Hui Zhao,<sup>a</sup> Bing Hou,<sup>a</sup> Yufu Tang,<sup>a</sup> Wenbo Hu,<sup>a</sup> Chao Yin,<sup>a</sup> Yu Ji,<sup>a</sup> Xiaomei Lu,<sup>ab</sup> Quli Fan\*<sup>a</sup> and Wei Huang\*<sup>ab</sup>

---

<sup>a</sup>Key Laboratory for Organic Electronics and Information Displays & Institute of Advanced Materials (IAM), Jiangsu National Synergetic Innovation Center for Advanced Materials (SICAM), Nanjing University of Posts & Telecommunications, 9 Wenyuan Road, Nanjing 210023, China. Fax: +86 25 8586 6533; Tel: +86 25 8586 6396; E-mail: iamqifan@njupt.edu.cn.

<sup>b</sup>Key Laboratory of Flexible Electronics (KLOFE) & Institute of Advanced Materials (IAM), Jiangsu National Synergetic Innovation Center for Advanced Materials (SICAM), Nanjing Tech University (NanjingTech), 30 South Puzhu Road, Nanjing 211816, China. Fax: +86 25 5813 9988; Tel: +86 25 5813 9001; E-mail: wei-huang@njupt.edu.cn.

c

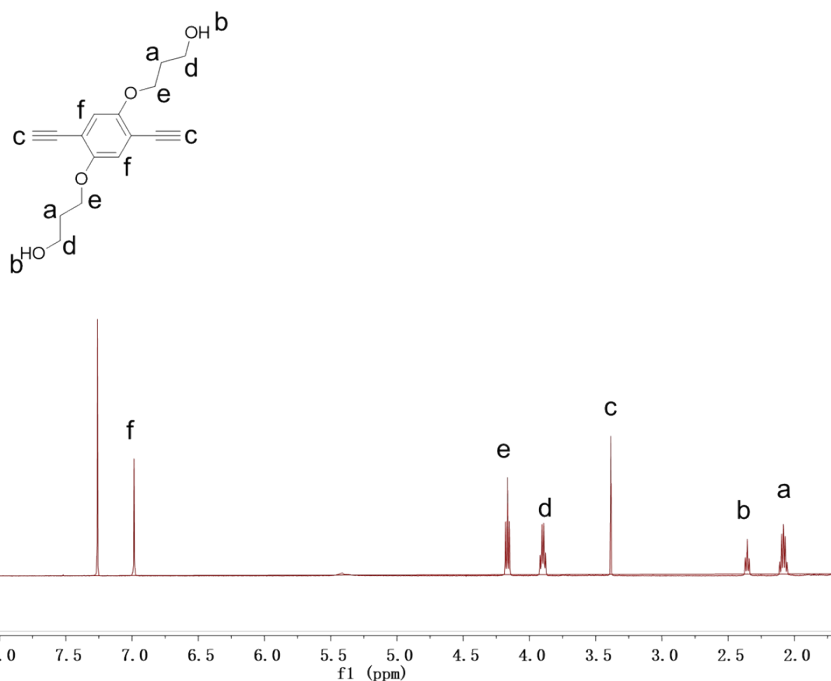

**Figure S1.**  $^1\text{H}$  NMR of the monomer 3, 3'-((2,5-diethynyl-1,4-phenylene) bis(oxy)) bis(propan-1-ol).  $\text{CDCl}_3$  was used as the solvent.

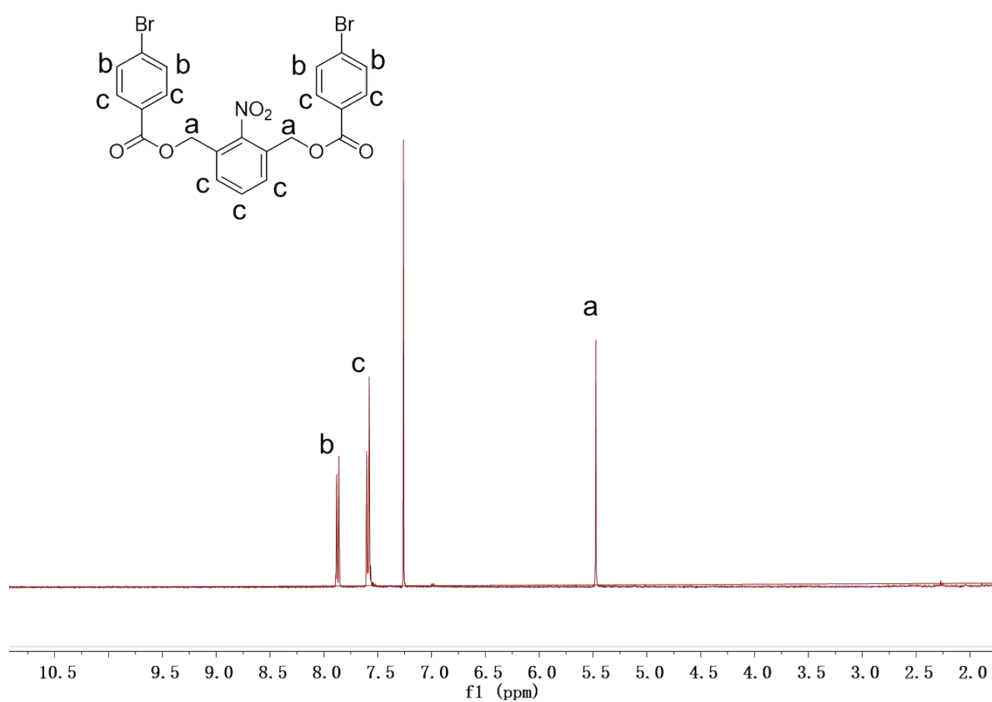

**Figure S2.**  $^1\text{H}$  NMR of the monomer (2-nitro-1,3-phenylene) bis(methylene) bis(4-bromobenzoate).  $\text{CDCl}_3$  was used as the solvent.

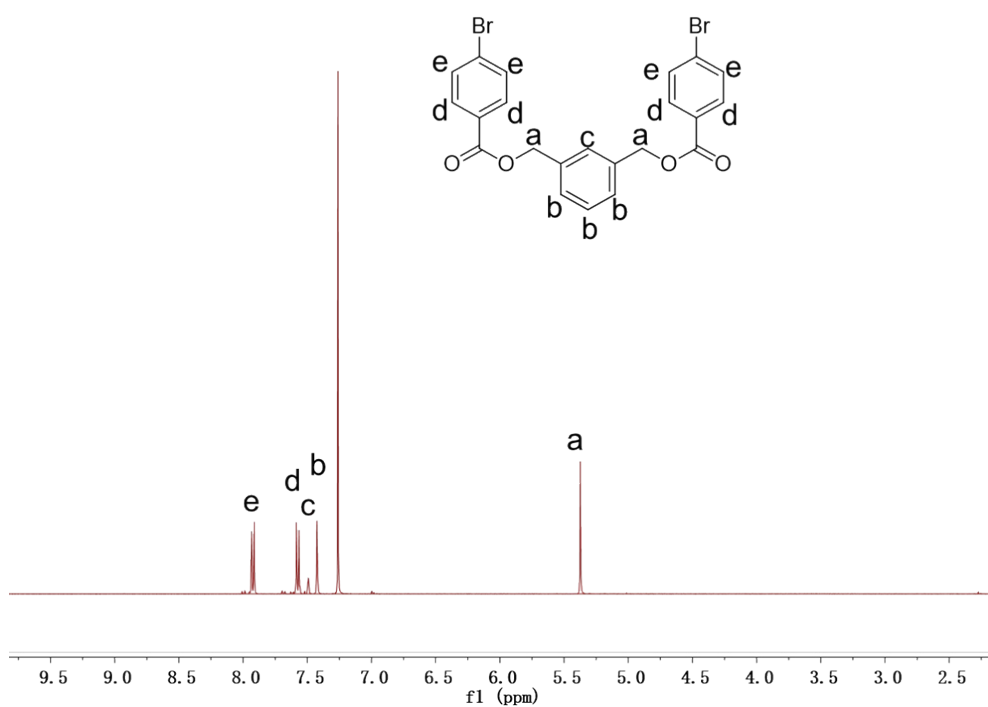

**Figure S3.** <sup>1</sup>H NMR of the monomer 1, 3-phenylenebis (methylene) bis (4-bromobenzoate). CDCl<sub>3</sub> was used as the solvent.

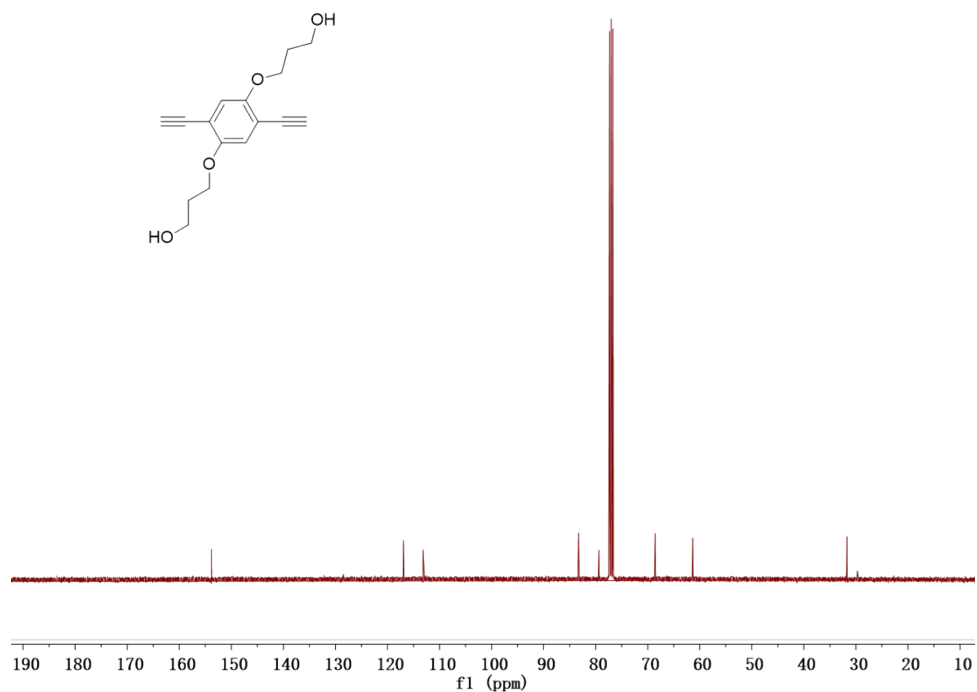

**Figure S4.** <sup>13</sup>C NMR of the monomer 3, 3'-((2, 5-diethynyl-1, 4-phenylene) bis (oxy)) bis (propan-1-ol). CDCl<sub>3</sub> was used as the solvent.

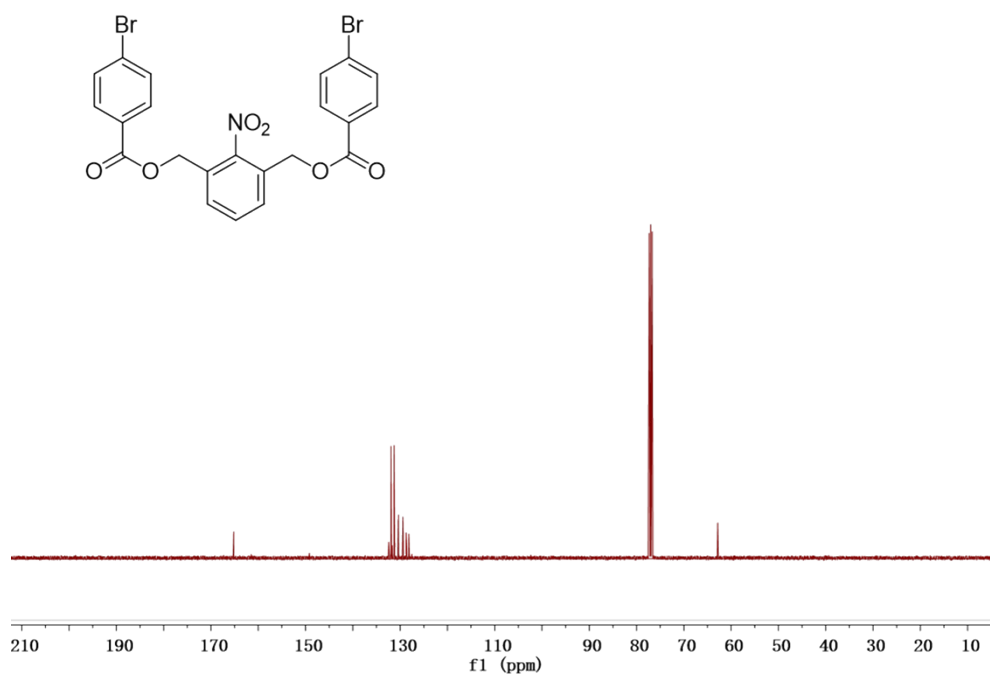

**Figure S5.** <sup>13</sup>C NMR of the monomer (2-nitro-1,3-phenylene) bis(methylene) bis(4-bromobenzoate). CDCl<sub>3</sub> was used as the solvent.

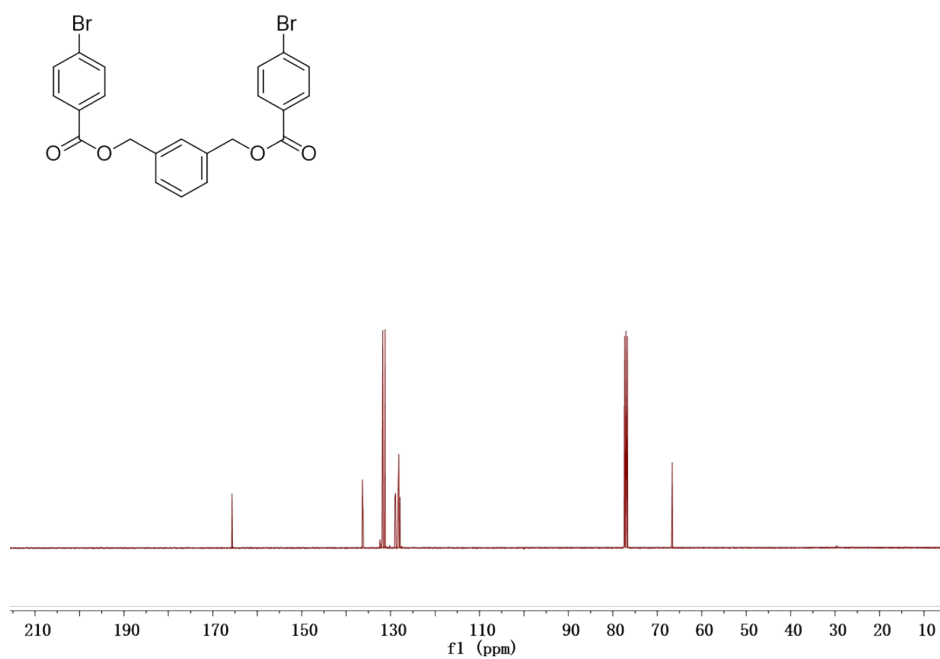

**Figure S6.** <sup>13</sup>C NMR of the monomer 1,3-phenylenebis(methylene) bis(4-bromobenzoate). CDCl<sub>3</sub> was used as the solvent.

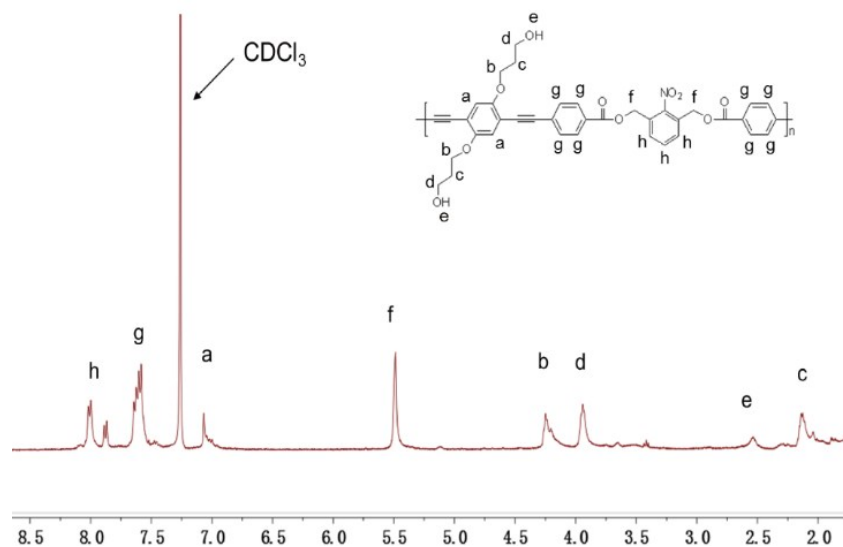

Figure S7.  $^1\text{H}$  NMR spectra of the photodegradable polymer Poly(ONB-*alt*-PEB),  $\text{CDCl}_3$  was used as the solvent

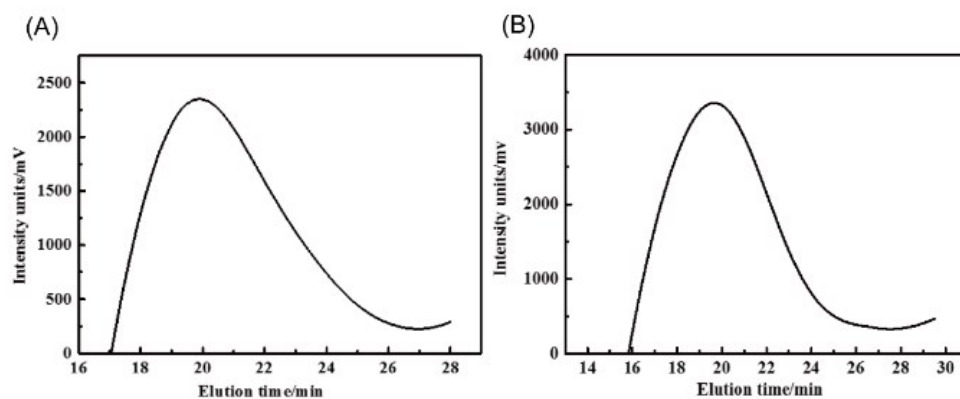

Figure S8. GPC traces of the Poly(ONB-*alt*-PEB) (A), and Poly(ONB-*alt*-PEB)-*g*-PEG (B)

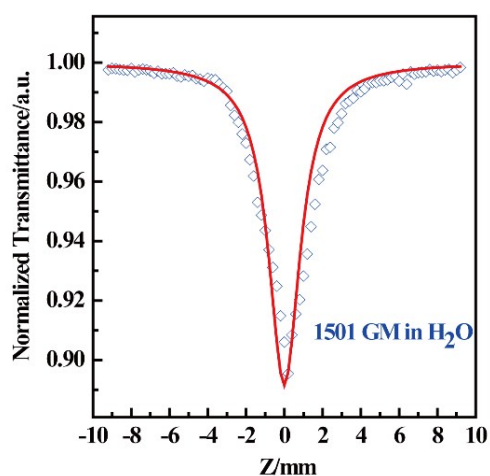

Figure S9. Open aperture Z-scan data of poly(ONB-*alt*-PEB)-*g*-PEG for the TPA cross sections obtained by using 800 nm femtosecond pulses.

**Table S1.**  $M_n$  and PDI of Poly (ONB-*alt*-PEB)-*g*-PEG before and after 380 nm and 800 nm irradiation for 1 h.

|                            | $M_n$ | PDI  |
|----------------------------|-------|------|
| no irradiation             | 14877 | 1.72 |
| 380 nm irradiation for 1 h | 7840  | 2.2  |
| 800 nm irradiation for 1 h | 7499  | 2.01 |

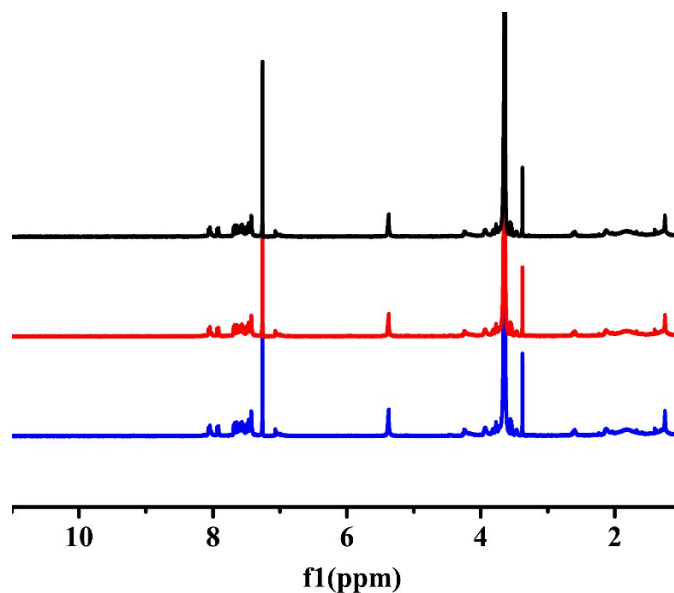

**Figure S10.**  $^1\text{H}$  NMR spectra of the Poly(OB-*alt*-PEB)-*g*-PEG before (black) and after 380 nm (blue) and 800 nm (red) irradiation for 1 h.,  $\text{CDCl}_3$  was used as the solvent.

**Table S2.**  $M_n$  and PDI of Poly (OB-*alt*-PEB)-*g*-PEG before and after 380 nm and 800 nm irradiation for 1 h.

|                            | $M_n$ | PDI  |
|----------------------------|-------|------|
| no irradiation             | 21059 | 1.8  |
| 380 nm irradiation for 1 h | 22558 | 1.5  |
| 800 nm irradiation for 1 h | 20102 | 1.75 |
